# Supplementary material
Source: MDPI journal article supplement (https://www.mdpi.com/2072-4292/15/11/2780)
Supplement: s1 [file s1]

Supplementary Material

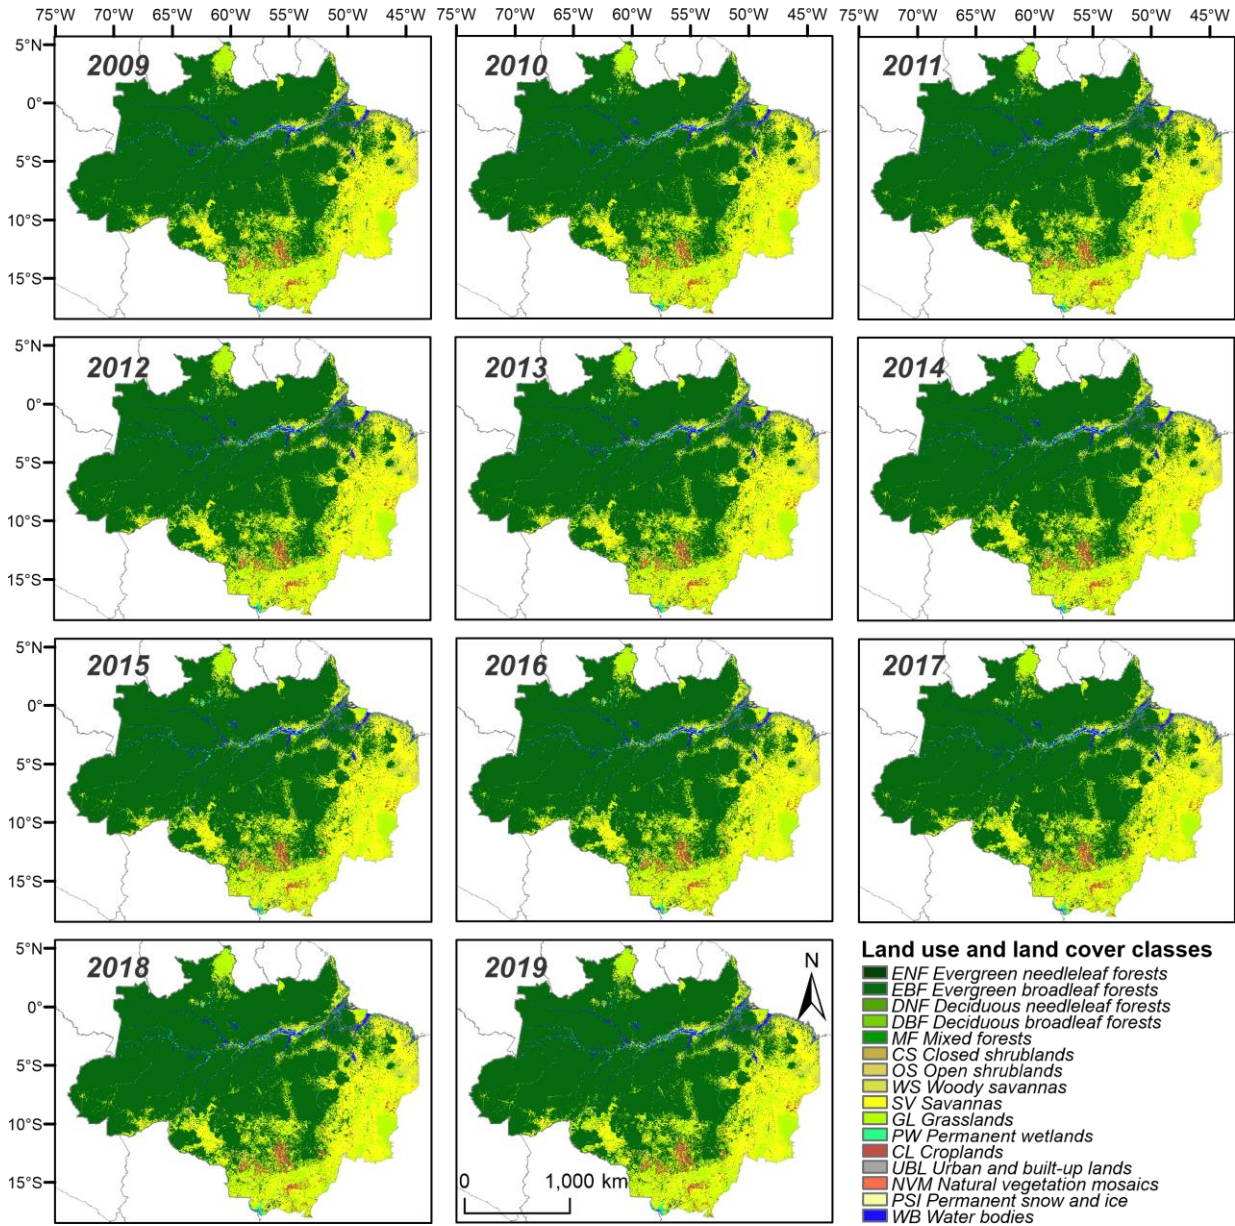

Figure S1. Land use and land cover classes in the BLA between 2009-2019.

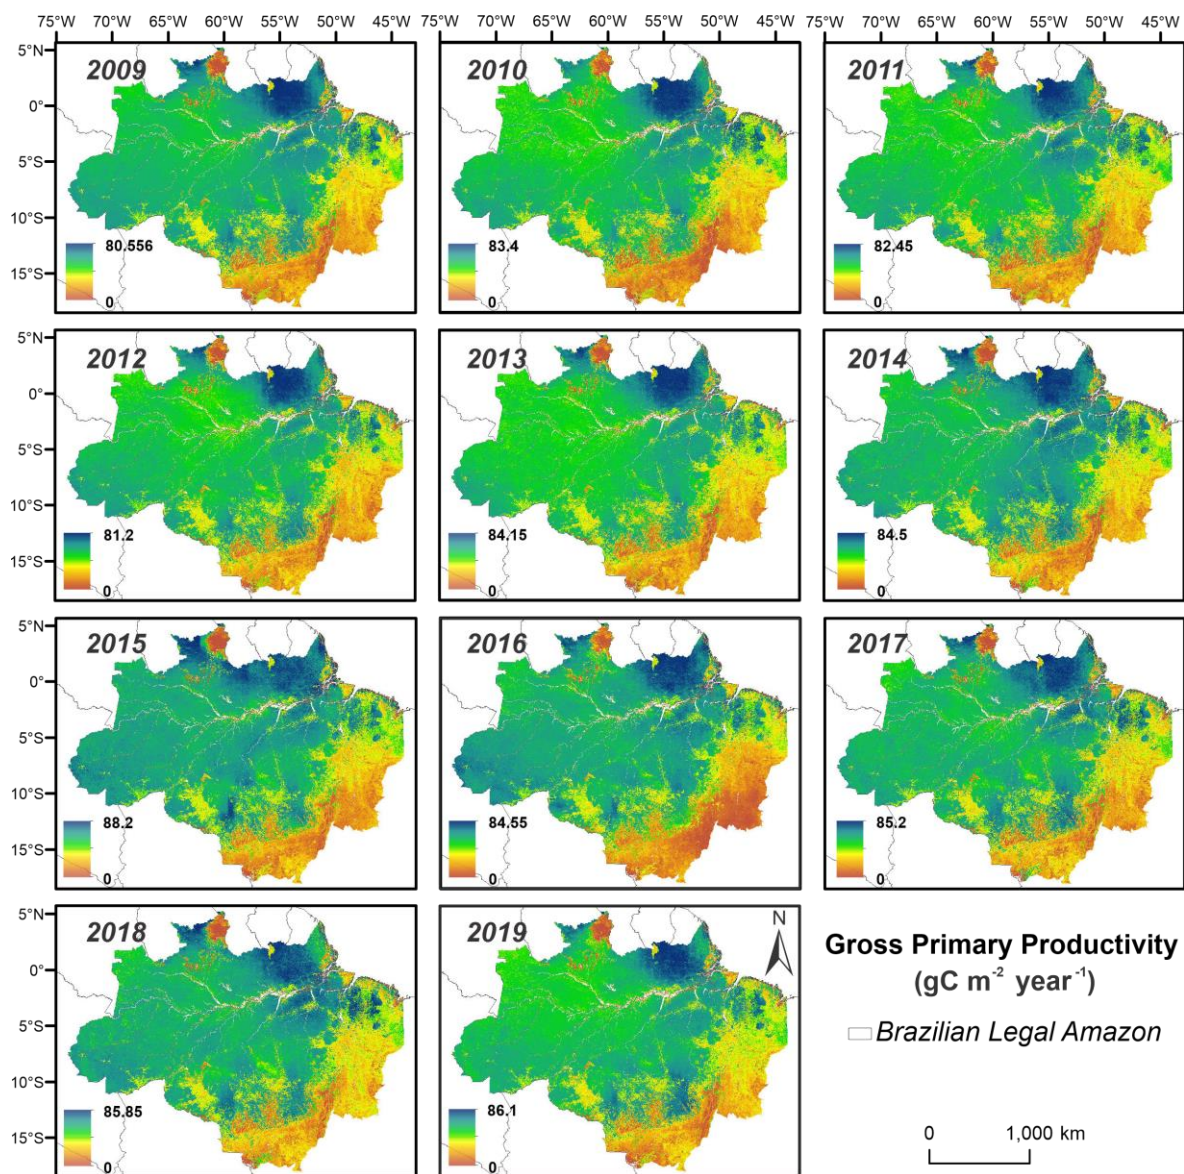

**Figure S2.** Annual median of gross primary production (gC m<sup>-2</sup> year<sup>-1</sup>) in the BLA between 2009 to 2019.



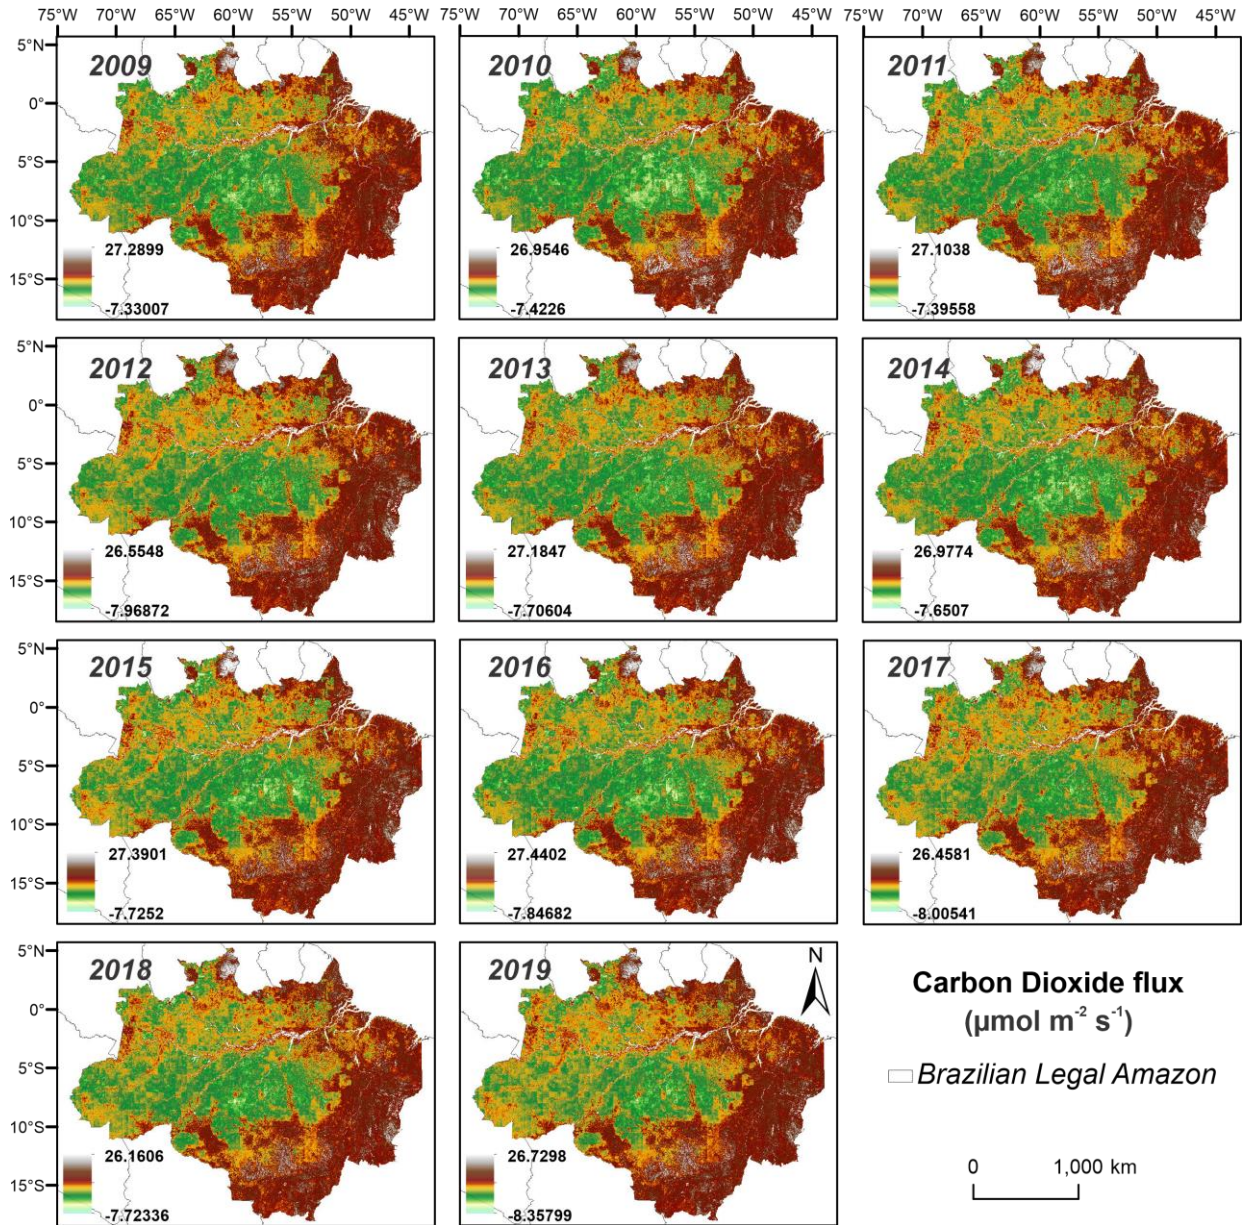

**Figure S3.** Annual median of carbon dioxide fluxes ( $\mu\text{mol m}^{-2} \text{s}^{-1}$ ) in the BLA between 2009 to 2019.

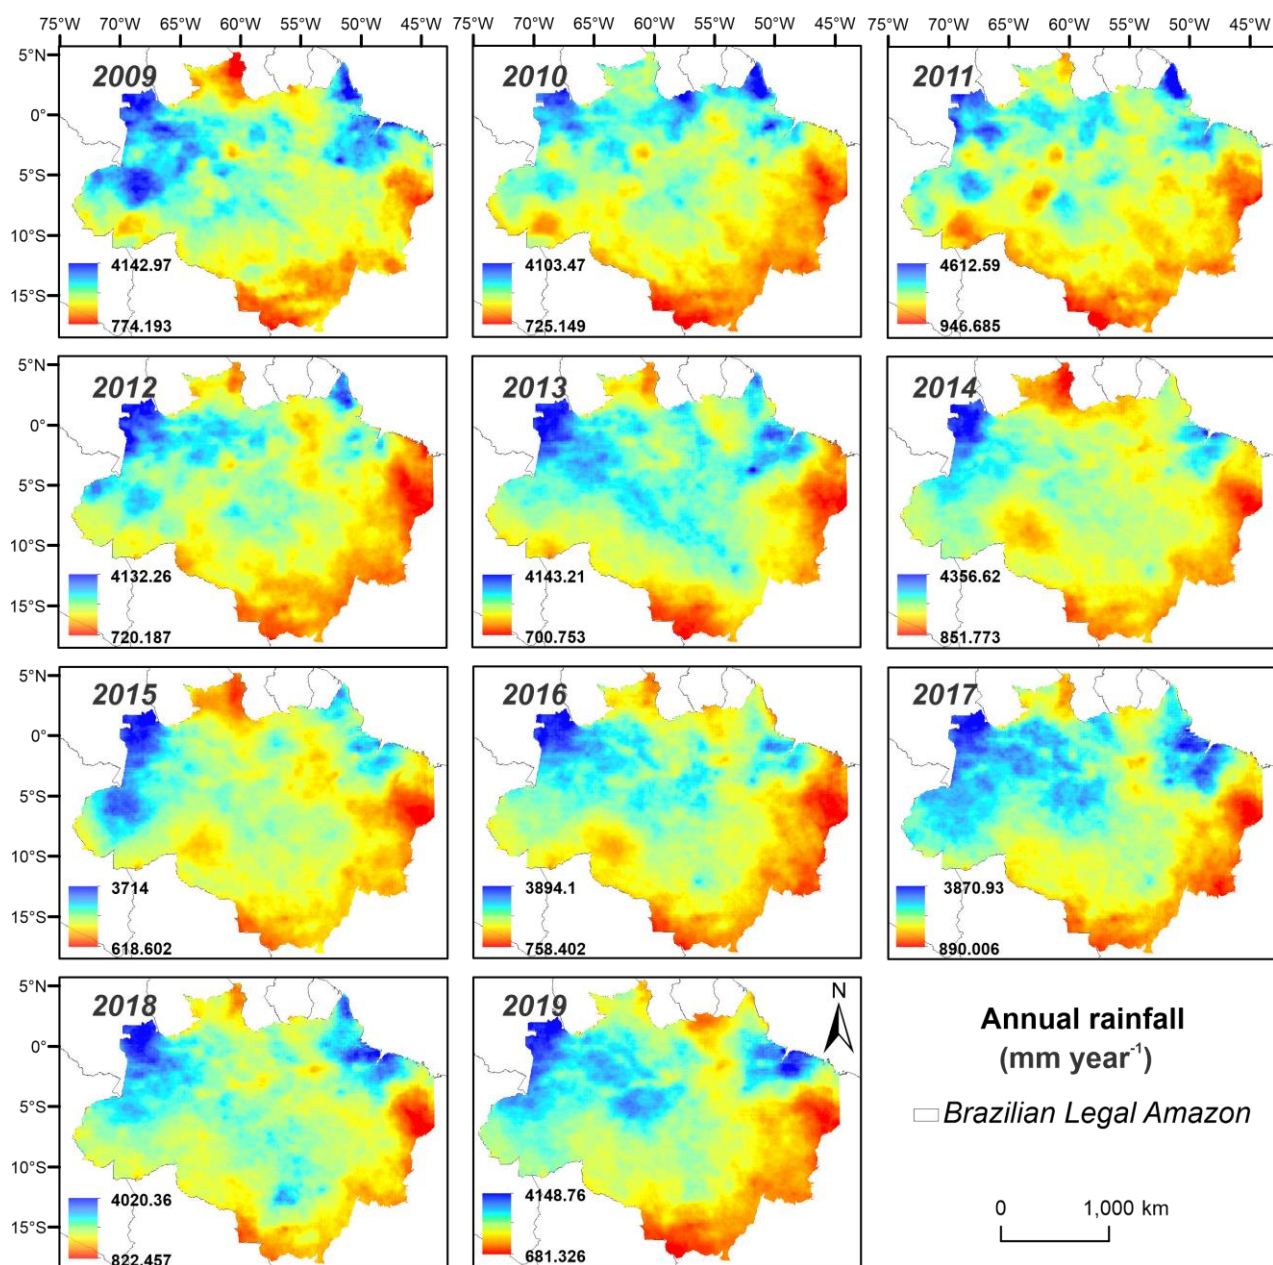

Figure S4. Accumulated rainfall (mm year<sup>-1</sup>) retrieved from CHIRPS data of the Legal Amazon from 2009 to 2019.

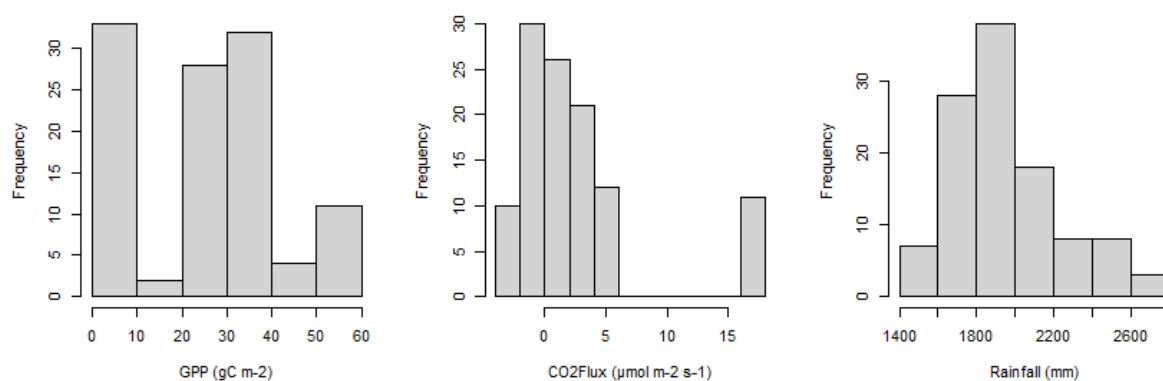

Figure S5. Histogram of the distribution frequency of GPP, CO<sub>2</sub>Flux and Rainfall data.

**Table S1.** Median values for the variables GPP, CO<sub>2</sub>Flux and Rainfall, for each use and land cover in the Legal Amazon from 2009 to 2019.

| Classes                | GPP (gC m <sup>-2</sup> )                                    |       |       |       |       |       |       |       |       |       |       |
|------------------------|--------------------------------------------------------------|-------|-------|-------|-------|-------|-------|-------|-------|-------|-------|
|                        | 2009                                                         | 2010  | 2011  | 2012  | 2013  | 2014  | 2015  | 2016  | 2017  | 2018  | 2019  |
| <b>EBF<sup>1</sup></b> | 51.53                                                        | 51.98 | 51.78 | 51.53 | 50.23 | 53.88 | 55.20 | 54.50 | 53.48 | 55.43 | 52.45 |
| <b>DBF</b>             | 34.63                                                        | 33.38 | 38.55 | 33.15 | 36.58 | 37.43 | 30.90 | 22.90 | 36.05 | 39.20 | 38.75 |
| <b>MF</b>              | 32,65                                                        | 29.00 | 30.43 | 34.33 | 32.93 | 28.95 | 28.95 | 22.35 | 36.23 | 35.80 | 35.23 |
| <b>WSV</b>             | 40.15                                                        | 36.63 | 39.70 | 38.08 | 41.73 | 39.68 | 39.25 | 35.53 | 42.50 | 43.10 | 41.93 |
| <b>SV</b>              | 33.30                                                        | 31.28 | 31.13 | 30.88 | 30.43 | 32.78 | 28.00 | 23.53 | 31.30 | 35.90 | 36.00 |
| <b>GL</b>              | 26.43                                                        | 29.15 | 28.23 | 23.60 | 22.60 | 26.80 | 23.70 | 16.25 | 25.48 | 29.30 | 31.25 |
| <b>PW</b>              | 0.45                                                         | 0.60  | 0.65  | 0.65  | 0.60  | 0.73  | 0.55  | 0.43  | 0.65  | 0.65  | 0.65  |
| <b>CL</b>              | 22.85                                                        | 19.05 | 21.63 | 21.65 | 20.68 | 22.35 | 21.00 | 16.88 | 22.78 | 23.00 | 24.03 |
| <b>UBL</b>             | 0.00                                                         | 0.00  | 0.00  | 0.00  | 0.00  | 0.00  | 0.00  | 0.00  | 0.00  | 0.00  | 0.00  |
| <b>WB</b>              | 0.00                                                         | 0.00  | 0.00  | 0.00  | 0.00  | 0.00  | 0.00  | 0.00  | 0.00  | 0.00  | 0.00  |
| Classes                | CO <sub>2</sub> Flux (μmol m <sup>-2</sup> s <sup>-1</sup> ) |       |       |       |       |       |       |       |       |       |       |
|                        | 2009                                                         | 2010  | 2011  | 2012  | 2013  | 2014  | 2015  | 2016  | 2017  | 2018  | 2019  |
| <b>EBF</b>             | -2.95                                                        | -3.55 | -3.07 | -2.88 | -1.44 | -3.55 | -3.23 | -3.17 | -3.13 | -3.47 | -3.50 |
| <b>DBF</b>             | -0.28                                                        | 0.05  | -0.07 | 0.09  | -0.16 | -0.13 | 0.06  | 0.04  | -0.17 | -0.07 | 0.03  |
| <b>MF</b>              | -0.39                                                        | 0.11  | -0.14 | -0.22 | -0.48 | -0.06 | -0.43 | -0.09 | -0.28 | -0.53 | -0.39 |
| <b>WSV</b>             | -0.89                                                        | -0.54 | -0.97 | -0.51 | -0.48 | -0.98 | -0.44 | -0.57 | -0.31 | -0.74 | -0.72 |
| <b>SV</b>              | 0.13                                                         | 0.57  | 0.22  | 0.69  | 0.31  | -0.08 | 0.38  | 0.61  | 0.15  | 0.11  | 0.01  |
| <b>GL</b>              | 3.74                                                         | 2.47  | 2.13  | 2.51  | 2.69  | 3.70  | 2.55  | 2.72  | 2.76  | 2.98  | 2.85  |
| <b>PW</b>              | 0.42                                                         | 1.00  | 0.93  | 0.97  | 0.43  | 1.00  | 0.74  | 0.76  | 0.72  | 0.67  | 0.43  |
| <b>CL</b>              | 3.32                                                         | 4.93  | 3.63  | 3.24  | 3.07  | 3.69  | 2.98  | 3.47  | 3.57  | 3.13  | 3.45  |
| <b>UBL</b>             | 5.19                                                         | 5.69  | 5.98  | 5.63  | 5.91  | 5.80  | 5.87  | 5.97  | 5.84  | 5.87  | 5.66  |
| <b>WB</b>              | 15.69                                                        | 17.28 | 16.09 | 16.41 | 16.93 | 15.85 | 15.04 | 15.44 | 15.25 | 15.66 | 15.44 |
| Classes                | Rainfall (mm)                                                |       |       |       |       |       |       |       |       |       |       |
|                        | 2009                                                         | 2010  | 2011  | 2012  | 2013  | 2014  | 2015  | 2016  | 2017  | 2018  | 2019  |
| <b>EBF</b>             | 2,402                                                        | 2,360 | 2,507 | 2,569 | 2,792 | 2,446 | 2,163 | 2,430 | 2,581 | 2,435 | 2,522 |
| <b>DBF</b>             | 1,750                                                        | 1,475 | 1,740 | 1,491 | 1,941 | 1,940 | 1,546 | 1,660 | 1,784 | 1,903 | 1,554 |
| <b>MF</b>              | 1,769                                                        | 1,528 | 1,780 | 1,677 | 2,016 | 1,910 | 1,643 | 1,716 | 1,819 | 1,978 | 1,598 |
| <b>WSV</b>             | 2,129                                                        | 1,810 | 2,182 | 1,788 | 2,023 | 2,109 | 1,706 | 1,764 | 1,852 | 1,880 | 1,846 |
| <b>SV</b>              | 1,767                                                        | 1,584 | 1,677 | 1,771 | 1,983 | 1,763 | 1,530 | 1,716 | 1,831 | 1,854 | 1,562 |
| <b>GL</b>              | 2,091                                                        | 1,808 | 2,018 | 1,798 | 1,848 | 1,680 | 1,533 | 1,605 | 1,749 | 1,856 | 1,758 |
| <b>PW</b>              | 2,025                                                        | 1,702 | 2,098 | 1,765 | 2,005 | 1,976 | 1,707 | 1,806 | 1,826 | 2,051 | 1,959 |
| <b>CL</b>              | 1,785                                                        | 1,527 | 1,897 | 1,682 | 1,815 | 1,942 | 1,563 | 1,688 | 1,884 | 2,074 | 1,658 |
| <b>UBL</b>             | 1,935                                                        | 1,830 | 2,061 | 1,885 | 2,046 | 1,999 | 1,605 | 1,679 | 1,999 | 2,057 | 2,120 |
| <b>WB</b>              | 2,378                                                        | 1,976 | 2,318 | 1,944 | 2,453 | 2,395 | 1,895 | 2,292 | 2,446 | 2,170 | 2,310 |

<sup>1</sup> Evergreen Broadleaf Forests (EBF), Deciduous Broadleaf Forests (DBF), Mixed Forests (MF), Woody Savannas (WSV), Savannas (SV), Grasslands (GL), Permanent Wetlands (PW), Croplands (CL), Urban and Built-up Lands (UBL) and Water Bodies (WB).



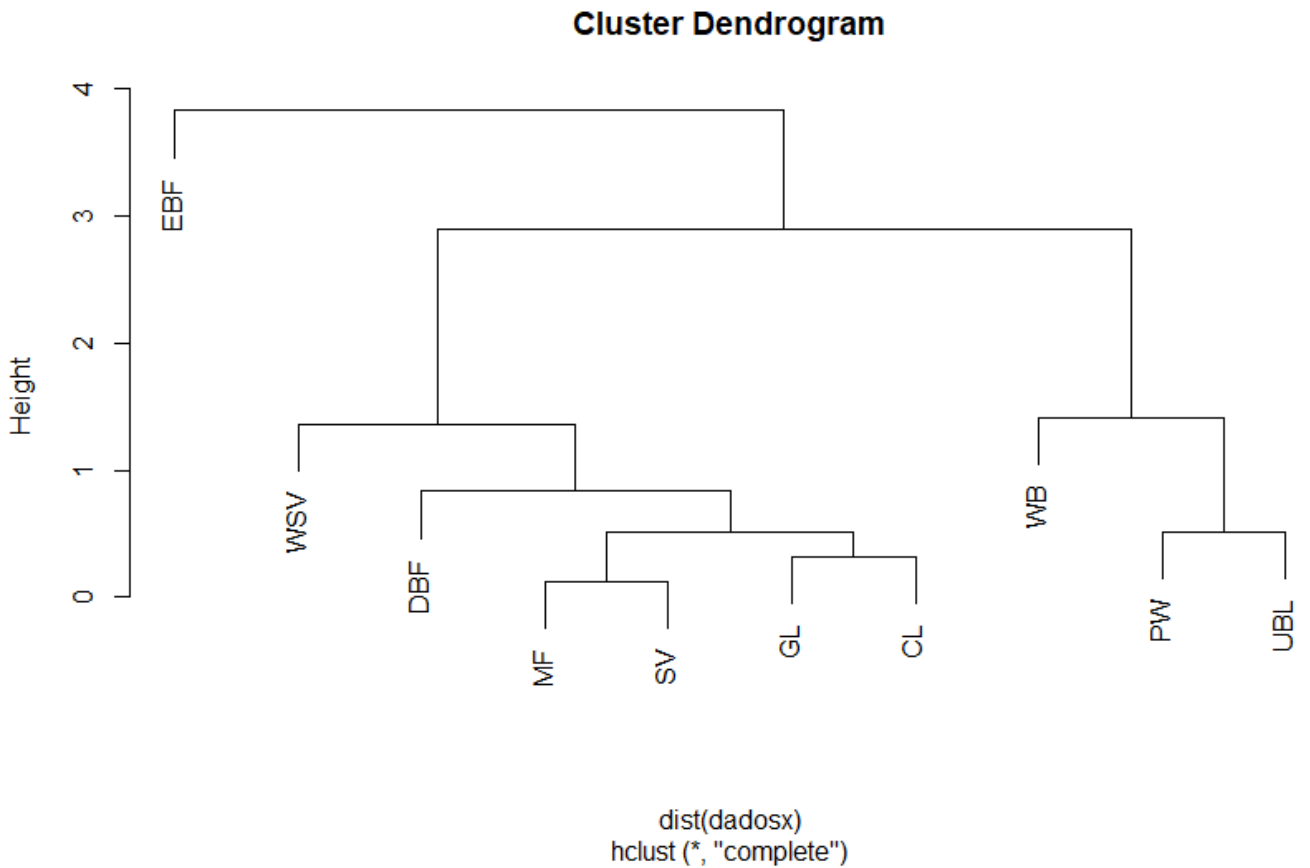

**Figure S6.** Cluster analysis for Evergreen Broadleaf Forests (EBF), Deciduous Broadleaf Forests (DBF), Mixed Forests (MF), Woody Savannas (WSV), Savannas (SV), Grasslands (GL), Permanent Wetlands (PW), Croplands (CL), Urban and Built-up Lands (UBL) and Water Bodies (WB) classes.
